# Supplementary material for: Rapid detection of Shiga toxin type II using lateral flow immunochromatography test strips of colorimetry and fluorimetry
Source: Royal Society of Chemistry journal article supplement (doi:10.1039/c9an01996k), 2019-10-29
Supplement: c9an01996k1.pdf [file c9an01996k1.pdf]

## Supporting information

### **Rapid detection of Shiga Toxin type II by lateral flow immunochromatography test strips of colorimetry and fluorimetry**

Tian Lu<sup>a</sup>, Kai-Di Zhu<sup>a</sup>, Chao Huang<sup>c</sup>, Tian Wen<sup>c</sup>, Yong-Jun Jiao<sup>c</sup>, Qing Zhang<sup>b</sup>, Jin Zhu<sup>d</sup> and Shou-Nian Ding<sup>a\*</sup>

<sup>a</sup> *Jiangsu Province Hi-Tech Key Laboratory for Bio-medical Research, School of Chemistry and Chemical Engineering, Southeast University, Nanjing 211189, China*

<sup>b</sup> *Chinese Academy of Inspection and Quarantine, Beijing 100176, China*

<sup>c</sup> *Jiangsu Provincial Center for Disease Prevention and Control, Key Laboratory of Enteric Pathogenic Microbiology, Ministry Health, Institute of Pathogenic Microbiology, Nanjing, Jiangsu Province, P. R. China*

<sup>d</sup> *Huadong Medical Institute of Biotechniques, Nanjing 210002, China*

\* Corresponding author. Fax: (+86) 25-52090621

E-mail: [snding@seu.edu.cn](mailto:snding@seu.edu.cn)

## Materials and methods

All pharmaceutical reagents were of analytical grade and were not purified that used directly in the following experiments. Chloroauric acid ( $\text{HAuCl}_4 \cdot 4\text{H}_2\text{O}$ ,  $\geq 47.8\%$ ), trisodium citrate dihydrate ( $\text{Na}_3\text{C}_6\text{H}_5\text{O}_7 \cdot 2\text{H}_2\text{O}$ ,  $\geq 98\%$ ), tellurium (Te, 99.9%), sodium borohydride ( $\text{NaBH}_4$ ,  $\geq 96\%$ ), cadmium chloride ( $\text{CdCl}_2 \cdot 2.5\text{H}_2\text{O}$ , 99.0%), sodium hydroxide ( $\text{NaOH}$ ,  $\geq 96\%$ ), sodium dihydrogen phosphate dihydrate ( $\text{NaH}_2\text{PO}_4 \cdot 2\text{H}_2\text{O}$ ,  $\geq 99\%$ ) and disodium hydrogen phosphate dodecahydrate ( $\text{Na}_2\text{HPO}_4 \cdot 12\text{H}_2\text{O}$ ,  $\geq 99\%$ ) were purchased from Sinopharm Chemical Reagent Co., Ltd. 3-mercaptopropionic acid (MPA,  $\geq 98\%$ ) was obtained from Aladdin Technology Co., Ltd. Potassium carbonate ( $\text{K}_2\text{CO}_3$ ,  $\geq 99\%$ ) and sucrose ( $\text{C}_{12}\text{H}_{22}\text{O}_{11}$ ) were acquired from Nanjing Chemical Reagent Co., Ltd. 1-(3-dimethylaminopropyl)-3-ethylcarbodiimide hydrochloride (EDC,  $\geq 99\%$ ) was offered from Sigma-Aldrich. Bovine serum albumin (BSA,  $\geq 96\%$ ) was obtained from Shenggong Co., Ltd. Phosphate buffer solution (PBS, 10 mM, pH 7.4) was freshly prepared before use. All aqueous solutions were prepared with double distilled water.

## Synthesis of colloidal gold nanoparticles

The synthesis of colloidal gold was carried out in a highly cleaned flask. Before the experiment, the flask was soaked with aqua regia [ $\text{HNO}_3/\text{HCl}$  (1:3)] (Attention: aqua regia is a very corrosive oxidizing agent, which should be handled with great care.) for 12 hours. After washing with secondary water, it was kept dry in drying oven. The synthesis of 15 nm Au NPs was similar to the previous literature with slight modification. 50 mL of 0.01%  $\text{HAuCl}_4 \cdot 4\text{H}_2\text{O}$  was added into a 100 mL of flask and heated to boiling with vigorous stirring, followed by the addition of 1%  $\text{Na}_3\text{C}_6\text{H}_5\text{O}_7 \cdot 2\text{H}_2\text{O}$ . The solution gradually changed from blue to burgundy. After heating for 30 minutes, the reaction was stopped and stored at 4 °C in the dark.

## Synthesis of CdTe quantum dots

According to the published literature<sup>1</sup>, the aqueous CdTe QDs were synthesized by hydrothermal method and the specific steps were changed. 7  $\mu\text{L}$  of MPA and 91.3 mg of  $\text{CdTe} \cdot 2.5\text{H}_2\text{O}$  were dissolved in 40 mL of water, and the pH of the above solution was adjusted to 11.0 with 1 M  $\text{NaOH}$  solution.  $\text{NaHTe}$  precursor was prepared by using  $\text{NaBH}_4$  and Te powder in  $\text{N}_2$  environment. 1 mL of the  $\text{NaHTe}$  solution (0.04 M) was pipetted into the above cadmium source solution, and the reaction was refluxed at 100 °C for 12 h with continuous stirring.

**Table S-1.** Au NPs based LFITS for STX2 stability detection.

Note: - Invisible + Weak visible ++ Visible +++ Clearly visible

| Serial number | Concentration of STX2<br>Ag(ng/mL) | T<br>Lines | C<br>Lines |
|---------------|------------------------------------|------------|------------|
| 1             | 0                                  | —          | +++        |
|               | 5                                  | —          | +++        |
|               | 10                                 | —          | +++        |
|               | 25                                 | +          | +++        |
|               | 50                                 | +          | +++        |
|               | 100                                | ++         | +++        |
|               | 200                                | +++        | +++        |
|               | 500                                | +++        | +++        |
|               | 1000                               | ++         | +++        |
|               | 2                                  | 0          | —          |
| 5             |                                    | —          | +++        |
| 10            |                                    | —          | +++        |
| 25            |                                    | —          | +++        |
| 50            |                                    | +          | +++        |
| 100           |                                    | ++         | +++        |
| 200           |                                    | +++        | +++        |
| 500           |                                    | +++        | +++        |
| 1000          |                                    | +++        | +++        |
| 3             |                                    | 0          | —          |

|      |     |     |
|------|-----|-----|
| 5    | —   | +++ |
| 10   | —   | +++ |
| 25   | +   | +++ |
| 50   | ++  | +++ |
| 100  | +++ | +++ |
| 200  | +++ | +++ |
| 500  | ++  | +++ |
| 1000 | +++ | +++ |

---

**Table S-2.** CdTe QDs based LFITS for STX2 stability detection.

Note: - Invisible + Weak visible ++ Visible +++ Clearly visible

| Serial number | Concentration of STX2<br>Ag(ng/mL) | T<br>Line | C<br>Line |
|---------------|------------------------------------|-----------|-----------|
| 1             | 0                                  | —         | +++       |
|               | 1                                  | —         | +++       |
|               | 5                                  | +         | ++        |
|               | 10                                 | +         | +++       |
|               | 50                                 | ++        | +++       |
|               | 100                                | +++       | +++       |
|               | 500                                | +++       | +++       |
|               | 1000                               | +++       | +++       |
| 2             | 0                                  | —         | +++       |
|               | 1                                  | —         | +++       |
|               | 5                                  | —         | +++       |
|               | 10                                 | +         | +++       |
|               | 50                                 | ++        | +++       |
|               | 100                                | +++       | +++       |
|               | 500                                | +++       | +++       |
|               | 1000                               | +++       | +++       |
| 3             | 0                                  | —         | +++       |
|               | 1                                  | —         | +++       |
|               | 5                                  | +         | +++       |
|               | 10                                 | +         | +++       |
|               | 50                                 | ++        | +++       |
|               | 100                                | +++       | +++       |
|               | 500                                | +++       | +++       |
|               | 1000                               | +++       | +++       |

## Notes and references

1. X. Zhang and S.-N. Ding, *Sensors and Actuators B: Chemical*, 2017, **240**, 1123-1133.
